# Supplementary material for: Investigating the zoonotic origin of the West African Ebola epidemic
Source: PubMed Central journal article supplement (PMC4309665; doi:10.15252/emmm.201404792), 2014-12-30
Supplement: emmm0007-0017-sd4.pdf [file emmm0007-0017-sd4.pdf]

## Investigating the Zoonotic Origin of the West African Ebola Epidemic

Almudena Marí Saéz, Sabrina Weiss, Kathrin Nowak, Vincent Lapeyre, Fee Zimmermann, Ariane Dux, Hjalmar S. Kühl, Moussa Kaba, Sebastien Regnaut, Kevin Merkel, Andreas Sachse, Ulla Thiesen, Lili Villányi, Christophe Boesch, Piotr W. Dabrowski, Aleksandar Radonić, Andreas Nitsche, Siv Aina J. Leendertz, Stefan Petterson, Stephan Becker, Verena Krähling, Emmanuel Couacy-Hymann, Chantal Akoua-Koffi, Natalie Weber, Lars Schaade, Jakob Fahr, Matthias Borchert, Jan F. Gogarten, Sébastien Calvignac-Spencer, Fabian H. Leendertz

*Corresponding author: Fabian Leendertz, Robert Koch Institut*

---

**Review timeline:**

|                     |                  |
|---------------------|------------------|
| Submission date:    | 27 October 2014  |
| Editorial Decision: | 25 November 2014 |
| Accepted:           | 10 December 2014 |

---

*Editor: Céline Carret*

**Transaction Report:**

No Peer Review Process File is available with this article, as the authors have chosen not to make the review process public in this case.
